# Supplementary material
Source: MDPI journal article supplement (https://www.mdpi.com/2076-3417/11/12/5438)
Supplement: s1 [file s1]

## Supplementary Materials

**Table S1.** Comparison between the score results for the gold standard segmentation in the included databases with details for each sample. For each score, the average value (and corresponding standard deviation at 1  $\sigma$ ) is reported.

| cases               | SPECIFICITY   | SENSITIVITY | PRECISION | F <sub>1</sub> SCORE |
|---------------------|---------------|-------------|-----------|----------------------|
| coronacases 001     | 0.9990        | 0.428       | 0.779     | 0.553                |
| coronacases 002     | 0.9996        | 0.669       | 0.903     | 0.769                |
| coronacases 003     | 0.9998        | 0.535       | 0.984     | 0.693                |
| coronacases 004     | 0.9999        | 0.511       | 0.902     | 0.652                |
| coronacases 005     | 0.9993        | 0.801       | 0.723     | 0.760                |
| coronacases 006     | 0.9988        | 0.849       | 0.657     | 0.741                |
| coronacases 007     | 0.9985        | 0.693       | 0.567     | 0.623                |
| coronacases 008     | 0.9993        | 0.563       | 0.851     | 0.678                |
| coronacases 009     | 0.9994        | 0.483       | 0.733     | 0.582                |
| coronacases 010     | 0.9979        | 0.621       | 0.767     | 0.686                |
| CORONACASES overall | 0.9992±0.0005 | 0.62±0.13   | 0.79±0.12 | 0.67±0.07            |
| RC006               | 0.9987        | 0.863       | 0.246     | 0.382                |
| RC017               | 0.9995        | 0.553       | 0.923     | 0.692                |
| RC036               | 0.9993        | 0.618       | 0.911     | 0.736                |
| RC058               | 0.9995        | 0.741       | 0.440     | 0.552                |
| RC143               | 0.9996        | 0.920       | 0.834     | 0.910                |
| GOLD STD OVERALL    | 0.9993±0.0003 | 0.74±0.14   | 0.67±0.28 | 0.65±0.18            |
| Overall             | 0.9992±0.0005 | 0.66±0.15   | 0.75±0.20 | 0.67±0.12            |

**Table S2.** Details of the various state-of-art methods referenced in the paper.

| Study            | Technique  | DataSet                     | Evaluation Metrics           | Comments                                                                             |
|------------------|------------|-----------------------------|------------------------------|--------------------------------------------------------------------------------------|
| Fan2020 [66]     | InfNet     |                             | Dice, Spec, Sens, Prec       |                                                                                      |
| Fan2020 [66]     | SemiInfNet |                             | Dice, Spec, Sens, Prec       |                                                                                      |
| Muller2020 [49]  | U-Net      | COVID-19-CT-Seg             | Dice, Sens, Spec             | Intensive Data Augmentation                                                          |
| Jun2020 [52]     | 3D U-Net   | COVID-19-CT-Seg, Many Other | Dice                         | Segmentation Benchmark: trained on Many Different Dataset, Validated on COVID-19-Seg |
| Jun2020 [52]     | 2D U-Net   | COVID-19-CT-Seg, Many Other | Dice                         | Segmentation Benchmark: trained on Many Different Dataset, Validated on COVID-19-Seg |
| Qingsen2020 [65] | U-Net      | 861 COVID-19 CT scans       | Dice, Sensitivity, Precision |                                                                                      |
